# Supplementary material
Source: Springer Nature journal article supplement (https://www.springermedizin.de/resource/supplementary/12955_2008_532_MOESM4_ESM.pdf/9560644)

Item: I've been feeling confident [I0010] - 2 Levels for Person Factor: GENDER

Slope  
0.62

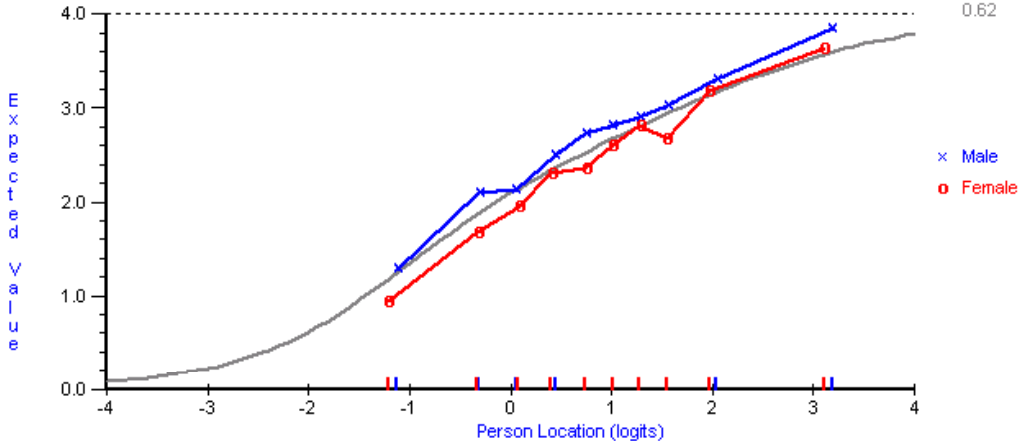

Supplement: MOESM4 [file 9560644]
